# Supplementary material
Source: PubMed Central journal article supplement (PMC5623952)
Supplement: NIHMS900241-supplement-supplemental_data.pdf [file NIHMS900241-supplement-supplemental_data.pdf]

**Supplementary Material for the Article:**

A developmental etiological model for drug abuse in men

Kenneth S. Kendler <sup>1,2,3</sup>, *kenneth.kendler@vcuhealth.org*

Henrik Ohlsson <sup>4</sup>, *Henrik.ohlsson@med.lu.se*

Alexis C. Edwards <sup>1,2</sup>, *alexis.edwards@vcuhealth.org*

Jan Sundquist <sup>4</sup>, *jan.sundquist@med.lu.se*

Kristina Sundquist <sup>4</sup>, *Kristina.sundquist@med.lu.se*

<sup>1</sup> Virginia Institute for Psychiatric and Behavioral Genetics, Virginia Commonwealth University, Richmond, VA, USA.

<sup>2</sup> Department of Psychiatry, Virginia Commonwealth University, Richmond VA, USA.

<sup>3</sup> Department of Human and Molecular Genetics, Virginia Commonwealth University, Richmond, VA, USA.

<sup>4</sup> Center for Primary Health Care Research, Lund University, Malmö, Sweden.

**Correspondence:**

Kenneth S. Kendler, MD,

Virginia Institute for Psychiatric and Behavioral Genetics of VCU,

Box 980126, Richmond, VA 23298-0126

Phone: (804) 828-8590

Fax: (804) 828-1471

E-mail: [Kenneth.Kendler@vcuhealth.org](mailto:Kenneth.Kendler@vcuhealth.org)

**This material supplements, but does not replace, the peer-reviewed paper in *Drug and Alcohol Dependence*.**

**Table 1:** The definition of the variables used in this study

| Variable                         | Register        | Period                          | Definition                                                                                                                                                                                                                                                                                                                                                                                                                                                                                                                                                                                                                                                                                                                                                                                                                                                                                                                                                                                                                                                                                                                                                                                                                                                       |
|----------------------------------|-----------------|---------------------------------|------------------------------------------------------------------------------------------------------------------------------------------------------------------------------------------------------------------------------------------------------------------------------------------------------------------------------------------------------------------------------------------------------------------------------------------------------------------------------------------------------------------------------------------------------------------------------------------------------------------------------------------------------------------------------------------------------------------------------------------------------------------------------------------------------------------------------------------------------------------------------------------------------------------------------------------------------------------------------------------------------------------------------------------------------------------------------------------------------------------------------------------------------------------------------------------------------------------------------------------------------------------|
| Father Alcohol Consumption       | CSRD            | Birth                           | How often has your father used alcoholic beverages? Never; Occasionally; Sometimes; Often.<br>Coding: 2=Often (3.9%); 1=Occasionally, Sometimes (76.1%); 0=Never (19.9%)                                                                                                                                                                                                                                                                                                                                                                                                                                                                                                                                                                                                                                                                                                                                                                                                                                                                                                                                                                                                                                                                                         |
| Low Parental education           | PoR             | Birth                           | Highest education achieved by either parent.<br>Coding: 1=Low (<=9 years, 59.5%); 2=Mid (10-11 years, 29.9%); 3=High (>=12 years, 10.6%).                                                                                                                                                                                                                                                                                                                                                                                                                                                                                                                                                                                                                                                                                                                                                                                                                                                                                                                                                                                                                                                                                                                        |
| Genetic Risk                     | MGR, CR, MR, PR | Birth                           | We calculated the morbid risk for HRB (that is a registration for DA, CB or AUD) for the population born 1940-1960 using an abridged Weinberg age correction. We defined three age groups defined as the first, second/third, and fourth quartiles of the age distribution of first HRB registration: <24 years weighted 0; 25-45 years weighted 0.5; and individuals > 45 years weighted 1. Thereafter, we performed a logistic regression analysis based on information from the Swedish population born 1940-1960 and their relatives (MZ twins, DZ twins and full-siblings, half-siblings, mother, father, and cousins). The model outcome variable was HRB and the predictor variable the morbid risk of HRB among the different relative types.<br>Coding: The individual predicted probabilities for HRB were categorized into three groups: High risk (highest decile); Medium risk (75th-90th p-tile); Low risk (0-75th p-tile)                                                                                                                                                                                                                                                                                                                         |
| Frequency of Corporal Punishment | CSRD            | Childhood and Early Adolescence | How often was corporal punishment used in your upbringing? Often; Sometimes; Occasionally; Never. Coding: 4=Often (1.2%); 3=Occasionally (10.6%); 2=Sometimes (48.7%); 1=Never (39.5%)                                                                                                                                                                                                                                                                                                                                                                                                                                                                                                                                                                                                                                                                                                                                                                                                                                                                                                                                                                                                                                                                           |
| Disruption in family             | CSRD            | Childhood and Early Adolescence | Are both your parents alive? (Q1) Yes, No<br>Are your parents divorced? (Q2) Yes, No<br>Coding: 1=No (Q1), Yes (Q2) (17.2%); 0=Yes (Q1), No (Q2) (82.8%)                                                                                                                                                                                                                                                                                                                                                                                                                                                                                                                                                                                                                                                                                                                                                                                                                                                                                                                                                                                                                                                                                                         |
| Parental Monitoring              | CSRD            | Childhood and Early Adolescence | Do you tell your parents what you do in your spare time?<br>Often, Sometimes, Rarely, Never<br>Coding: 4=Never (2.9%), 3=Rarely (14.1%), 2=Sometimes (51.9%), 1=Often (31.1%)                                                                                                                                                                                                                                                                                                                                                                                                                                                                                                                                                                                                                                                                                                                                                                                                                                                                                                                                                                                                                                                                                    |
| Move During Childhood            | CSRD            | Childhood and Early Adolescence | How many places have you resided in during your childhood?<br>Coding: 1=1 place (59.1%); 2= 2places (22.9%); 3=3 places (9.9%); 4=4 places (8.0%)                                                                                                                                                                                                                                                                                                                                                                                                                                                                                                                                                                                                                                                                                                                                                                                                                                                                                                                                                                                                                                                                                                                |
| Urbanization                     | CSRD            | Childhood and Early Adolescence | Where have you mainly been residing during you childhood? Greater-Stockholm, Göteborg or Malmö; Other city with more than 50,000 inhabitants; Other city with less than 50,000; In the countryside; Abroad<br>Coding: 1= Greater-Stockholm, Göteborg or Malmö (20.8%), 0=Else (79.2%)                                                                                                                                                                                                                                                                                                                                                                                                                                                                                                                                                                                                                                                                                                                                                                                                                                                                                                                                                                            |
| Internalizing Behavior           | CSRD            | Childhood and Early Adolescence | Factor analysis based on the following variables:<br>How is your health status at the moment? 1=Very Well; 2=Ok; 3=Neither good or bad; 4=Not so good; 4=Bad<br>Does it happen that you have a headache? 1=Yes, often; 2=Yes, sometime; 3=Yes, rarely; 4=No, never<br>Do you have trouble sleeping? 1=Yes, often; 2=Yes, sometime; 3=Yes, rarely; 4=No, never<br>Do you often have an upset stomach? 1=Yes, often; 2=Yes, sometime; 3=Yes, rarely; 4=No, never<br>Are you often nervous? 1=Yes, often; 2=Yes, sometime; 3=Yes, rarely; 4=No, never<br>Have you ever taken medication for your nerves? 1=Yes, often; 2=Yes, sometime; 3=No, never<br>Do you often feel low? 1=Yes, often; 2=Yes, sometime; 3=Yes, rarely; 4=No, never<br>Do you feel uncertain when you are together with others? 1=Yes, often; 2=Yes, sometime; 3=Yes, rarely; 4=No, never<br>Do you think you are more sensitive than others? 1=Yes, a lot; 2=Yes, slightly; 3=Like others; 4=No, slightly less; 5=No, a lot less<br>Do you easily get anxious and restless? 1=Yes, very easy; 2=Yes, rather easy; 3=Like others; 4=No, rarely; 5=No, never<br>Do you get irritated when things are supposed to go quickly? 1=Yes, often; 2=Yes, sometimes; 3=Yes, once in a while; 4=No, never |
| Externalizing Behavior           | CSRD            | Childhood and Early Adolescence | Factor analysis based on the following variables:<br>How did you get along with your teachers in school? 1=Very Well; 2=Ok; 3=Not so good; 4=Bad<br>Have you ever been treated unfairly in school? 1=Yes, several times; 2=Yes, sometime; 3=No, never<br>How often did you skip school? 1=Once a week; 2=Once a month; 3=Once every semester; 4=Few times<br>Have your ever have bad grades in order and conduct? 1=Yes, several times; 2=Yes, once; 3=No, never<br>Have you ever been in contact with the police or child welfare committee? 1=Yes, several times; 2=Yes, sometime; 3=No, never<br>Have you ever quit a work due to unfair treatment? 1=Yes, several times; 2=Yes, once; 3=No, never<br>Have you ever been fired from a job? 1=Yes, several times; 2=Yes, once; 3=No, never                                                                                                                                                                                                                                                                                                                                                                                                                                                                     |

|                                   |      |                  |                                                                                                                                                                                                                                                                                                                                                                                                                                                                                                                                                                                                                                                                                                                                                                                                                                                                                                           |
|-----------------------------------|------|------------------|-----------------------------------------------------------------------------------------------------------------------------------------------------------------------------------------------------------------------------------------------------------------------------------------------------------------------------------------------------------------------------------------------------------------------------------------------------------------------------------------------------------------------------------------------------------------------------------------------------------------------------------------------------------------------------------------------------------------------------------------------------------------------------------------------------------------------------------------------------------------------------------------------------------|
|                                   |      |                  | <p>Have you ever run away from home?<br/>1=Yes, twice or more; 2=Yes, once; 3=No, never</p> <p>Have you ever taken anything from a store without paying?<br/>1=Yes, several times; 2=Yes, sometime; 3=No, never</p>                                                                                                                                                                                                                                                                                                                                                                                                                                                                                                                                                                                                                                                                                       |
| Neighborhood Socioeconomic Status | PR   | Late Adolescence | Factor analysis based on the share of unemployed males in the age range 24-65 in the parish the individual resided in in 1965 and in 1970 and the share of individual within the parish that were defined by statistics Sweden as living in a household that was "overcrowded".                                                                                                                                                                                                                                                                                                                                                                                                                                                                                                                                                                                                                           |
| Resilience                        | CTS  | Late Adolescence | Resilience is designed to measure the ability to cope with psychologically stressful situations and is assessed on a 1 to 9 graded scale corresponding to a categorized Normal distribution centered at 5. The score is assigned by a psychologist who conducts with every conscript a semi-structured conversation that averages 20–25 minutes. The psychologists conducting the interview are specially trained and their performance does not vary from region to region, because training is conducted nationally. The interview is in a free form in which the conscript describes his everyday life. There are five predefined sections (experiences from school, work experiences, leisure time, home environment, and emotional stability) though the order can vary. Background information such as school grades, job experiences, and test results are provided to the interviewer in advance. |
| IQ                                | CTS  | Late Adolescence | IQ is measured by four subtests representing logical, spatial, verbal, and technical abilities. The global IQ score, derived from a summation of the four subtests, was standardized to give a Gaussian distributed score between one and nine.                                                                                                                                                                                                                                                                                                                                                                                                                                                                                                                                                                                                                                                           |
| Sniffing Glue                     | CSRD | Late Adolescence | Have you ever sniffed glue or something similar? 1=More than 10 times; 2=Yes 2-10 times; 3=Yes, Once; 4=No. Coded into Yes (13.2%) and No (86.8%).                                                                                                                                                                                                                                                                                                                                                                                                                                                                                                                                                                                                                                                                                                                                                        |
| Drug Use                          | CSRD | Early adulthood  | <p>Factor analysis based on the following variables:<br/>Have you ever used narcotics? Yes/No<br/>Q4: What type of drug have you used most often?<br/>Preludin (0.17%), Amfetamin (0.25%), Hasch/Marihuana (8.61%), Morphine (0.11%), LSD (0.39%), Mebumal/Nembutal (0.69%), Opium (0.11%), Meproban (0.20%), Other (0.16%)<br/>Recoded into 0=No use, 1=Hasch/Marihuana, 2=Else<br/>How many times have you used narcotics? 1=More than 50 times; 2=11-50 times; 3=5-10 times; 4=2-4 times; 5=once; 6=Never<br/>Have you ever used a needle to inject narcotics? 1=Yes, several times; 2=Yes, once; 3=No, never<br/>How many times have you used narcotics the last 4 weeks? 1=More than 10 times; 2= 5-10 times; 3=2-4 times; 4=Once; 5=0</p>                                                                                                                                                           |
| Low Education                     | PoR  | Early adulthood  | <p>Educational level achieved in 1975.<br/>Coding: 1=Low (&lt;=9 years, 23.4%); 2=Mid (10-11 years, 45.3%); 3=High (&gt;=12 years, 31.4%).</p>                                                                                                                                                                                                                                                                                                                                                                                                                                                                                                                                                                                                                                                                                                                                                            |
| Unemployed                        | PoR  | Early adulthood  | Not employed the final week in October 1975. Coding 1=Not Employed (3.5%); 0=Else (96.5%)                                                                                                                                                                                                                                                                                                                                                                                                                                                                                                                                                                                                                                                                                                                                                                                                                 |
| Unmarried                         | PoR  | Early adulthood  | Coding: 0=Married prior to 1976 (42.5%); 1=Else (57.5%)                                                                                                                                                                                                                                                                                                                                                                                                                                                                                                                                                                                                                                                                                                                                                                                                                                                   |
| Criminal Behavior                 | CR   | Early adulthood  | Criminal behavior (CB) was identified by registration in the Swedish Crime (or conviction) register which excluded convictions for minor crimes like traffic infractions. The registration had to occur prior to 1976 (5.3% registered for CB)                                                                                                                                                                                                                                                                                                                                                                                                                                                                                                                                                                                                                                                            |
| Alcohol Use Disorders             | CR   | Early adulthood  | For a definition of Alcohol Use Disorders (AUD) see (Kendler et al., 2015). The registration had to occur prior to 1976 (1.5% registered for AUD)                                                                                                                                                                                                                                                                                                                                                                                                                                                                                                                                                                                                                                                                                                                                                         |

**Table 2: Correlation Matrix Of Model Variables**

|     | GR   | FAC  | LPE  | FCP  | DF   | PM   | Mo   | UR   | IB   | EB   | NSE  | IQ   | RE   | GL   | DS   | LE   | UE   | UM   | CB   | AUD  | DA |  |
|-----|------|------|------|------|------|------|------|------|------|------|------|------|------|------|------|------|------|------|------|------|----|--|
| GR  | 1    |      |      |      |      |      |      |      |      |      |      |      |      |      |      |      |      |      |      |      |    |  |
| FAC | 0.21 | 1    |      |      |      |      |      |      |      |      |      |      |      |      |      |      |      |      |      |      |    |  |
| LPE | 0.02 | 0.04 | 1    |      |      |      |      |      |      |      |      |      |      |      |      |      |      |      |      |      |    |  |
| FCP | 0.09 | 0.08 | 0.00 | 1    |      |      |      |      |      |      |      |      |      |      |      |      |      |      |      |      |    |  |
| DF  | 0.23 | 0.19 | 0.01 | 0.03 | 1    |      |      |      |      |      |      |      |      |      |      |      |      |      |      |      |    |  |
| PM  | 0.10 | 0.05 | 0.15 | 0.12 | 0.13 | 1    |      |      |      |      |      |      |      |      |      |      |      |      |      |      |    |  |
| Mo  | 0.12 | 0.04 | 0.23 | 0.09 | 0.18 | 0.00 | 1    |      |      |      |      |      |      |      |      |      |      |      |      |      |    |  |
| UR  | 0.04 | 0.15 | 0.23 | 0.01 | 0.15 | 0.08 | 0.08 | 1    |      |      |      |      |      |      |      |      |      |      |      |      |    |  |
| IB  | 0.08 | 0.14 | 0.03 | 0.18 | 0.16 | 0.19 | 0.04 | 0.02 | 1    |      |      |      |      |      |      |      |      |      |      |      |    |  |
| EB  | 0.25 | 0.25 | 0.07 | 0.25 | 0.29 | 0.39 | 0.13 | 0.13 | 0.52 | 1    |      |      |      |      |      |      |      |      |      |      |    |  |
| NSE | 0.01 | 0.02 | 0.08 | 0.02 | 0.06 | 0.03 | 0.11 | 0.17 | 0.04 | 0.03 | 1    |      |      |      |      |      |      |      |      |      |    |  |
| IQ  | 0.13 | 0.06 | 0.26 | 0.05 | 0.07 | 0.21 | 0.02 | 0.11 | 0.10 | 0.19 | 0.06 | 1    |      |      |      |      |      |      |      |      |    |  |
| RE  | 0.13 | 0.14 | 0.08 | 0.15 | 0.25 | 0.29 | 0.05 | 0.02 | 0.62 | 0.49 | 0.03 | 0.27 | 1    |      |      |      |      |      |      |      |    |  |
| GL  | 0.17 | 0.17 | 0.05 | 0.16 | 0.20 | 0.26 | 0.08 | 0.10 | 0.35 | 0.66 | 0.07 | 0.13 | 0.33 | 1    |      |      |      |      |      |      |    |  |
| DS  | 0.15 | 0.18 | 0.09 | 0.15 | 0.22 | 0.21 | 0.08 | 0.31 | 0.35 | 0.64 | 0.04 | 0.02 | 0.35 | 0.58 | 1    |      |      |      |      |      |    |  |
| LE  | 0.11 | 0.08 | 0.35 | 0.07 | 0.08 | 0.20 | 0.03 | 0.09 | 0.08 | 0.28 | 0.03 | 0.49 | 0.23 | 0.20 | 0.03 | 1    |      |      |      |      |    |  |
| UE  | 0.08 | 0.08 | 0.04 | 0.07 | 0.11 | 0.10 | 0.10 | 0.13 | 0.15 | 0.29 | 0.06 | 0.02 | 0.14 | 0.15 | 0.23 | 0.00 | 1    |      |      |      |    |  |
| UM  | 0.01 | 0.00 | 0.04 | 0.01 | 0.01 | 0.01 | 0.01 | 0.04 | 0.04 | 0.03 | 0.03 | 0.03 | 0.08 | 0.01 | 0.07 | 0.09 | 0.19 | 1    |      |      |    |  |
| CB  | 0.20 | 0.15 | 0.05 | 0.13 | 0.18 | 0.23 | 0.09 | 0.09 | 0.21 | 0.56 | 0.00 | 0.14 | 0.26 | 0.37 | 0.36 | 0.22 | 0.35 | 0.14 | 1    |      |    |  |
| AUD | 0.17 | 0.15 | 0.09 | 0.14 | 0.19 | 0.23 | 0.13 | 0.09 | 0.27 | 0.56 | 0.08 | 0.13 | 0.29 | 0.37 | 0.37 | 0.18 | 0.34 | 0.22 | 0.63 | 1    |    |  |
| DA  | 0.16 | 0.20 | 0.02 | 0.14 | 0.18 | 0.20 | 0.09 | 0.14 | 0.31 | 0.54 | 0.03 | 0.09 | 0.30 | 0.38 | 0.47 | 0.13 | 0.37 | 0.18 | 0.56 | 0.57 | 1  |  |

\*Numbers in red are negative

|                                        |                             |                            |
|----------------------------------------|-----------------------------|----------------------------|
| FAC = Father Alcohol Consumption       | UR = Urbanization           | DS = Drug Use              |
| SES = Parental Education               | IB = Internalizing Behavior | LE=Low Education           |
| GR = Genetic Risk                      | EB = Externalizing Behavior | UE = Unemployed            |
| FCP = Frequency of Corporal Punishment | NSE = Neighborhood SES      | UM = Unmarried             |
| DF = Disruption in family              | RE = Low Resilience         | CB = Criminal Behavior     |
| PM = Low parental Monitoring           | IQ = Low IQ                 | AUD = Alcohol Use Disorder |
| Mo=Move                                | GL = Sniffing Glue          | DA = Drug Abuse            |

**References**

Kendler, K.S., Ji, J., Edwards, A.C., Ohlsson, H., Sundquist, J., Sundquist, K., 2015. An extended Swedish national adoption study of alcohol use disorder. *JAMA Psychiatry* 72, 211-8.
